# Supplementary material for: Genetic mapping high protein content QTL from soybean ‘Nanxiadou 25’ and candidate gene analysis
Source: PubMed Central journal article supplement (PMC8377855; doi:10.1186/s12870-021-03176-2), 2021-08-20

Gm01(D1a)

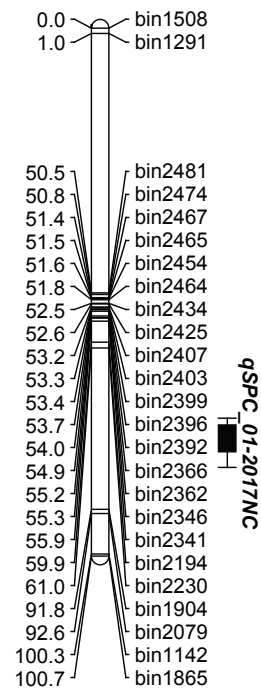

Gm02(D1b)

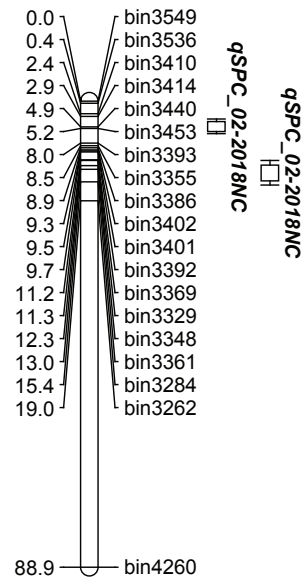

Gm03(N)

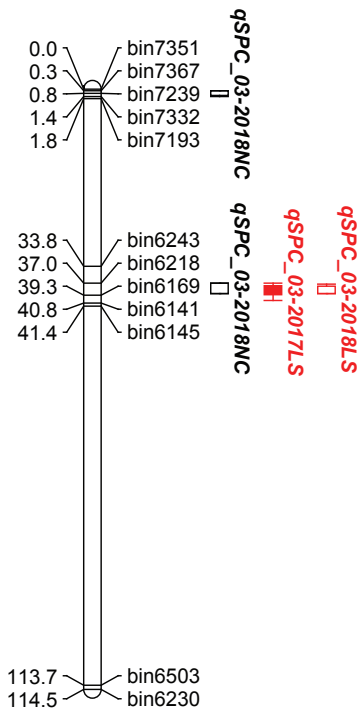

Gm05(A1)

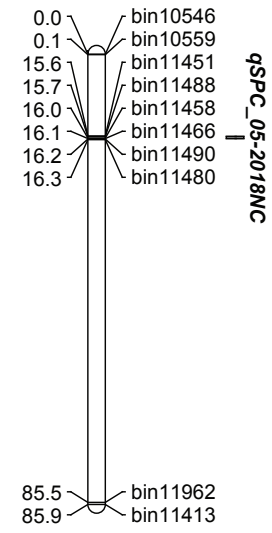

Gm06(C2)

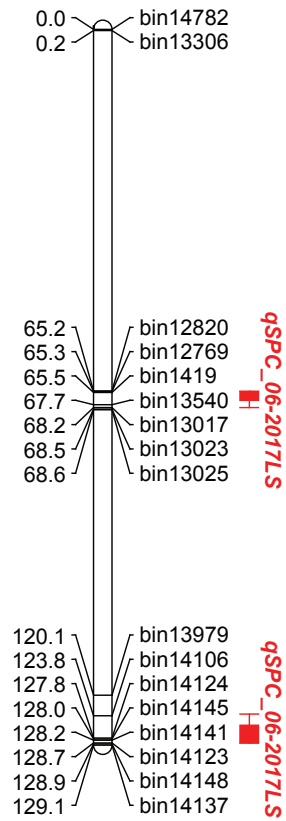

Gm07(M)

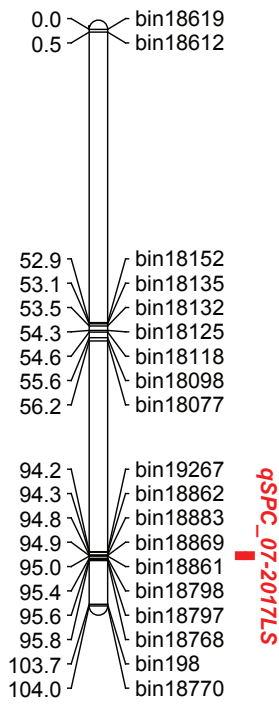

Gm08(A2)

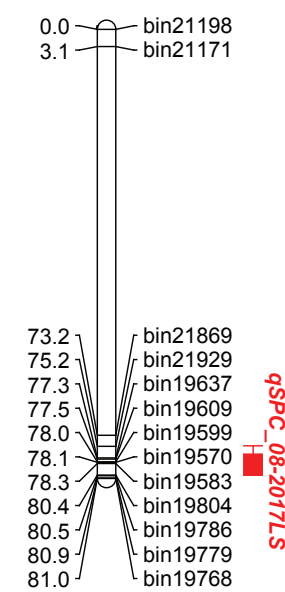

Gm09(K)

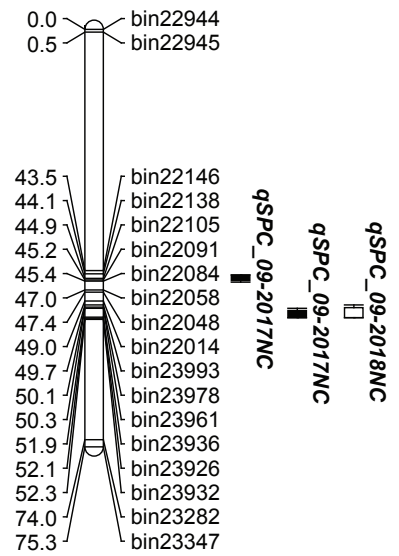

Gm10(O)

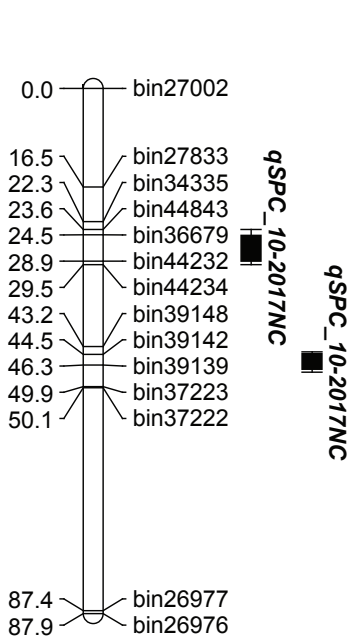

Gm11(B1)

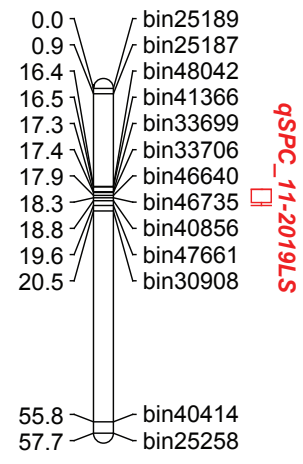

Gm13(F)

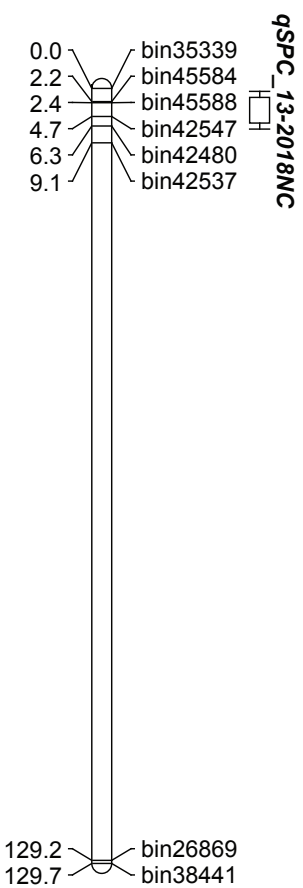

Gm15(E)

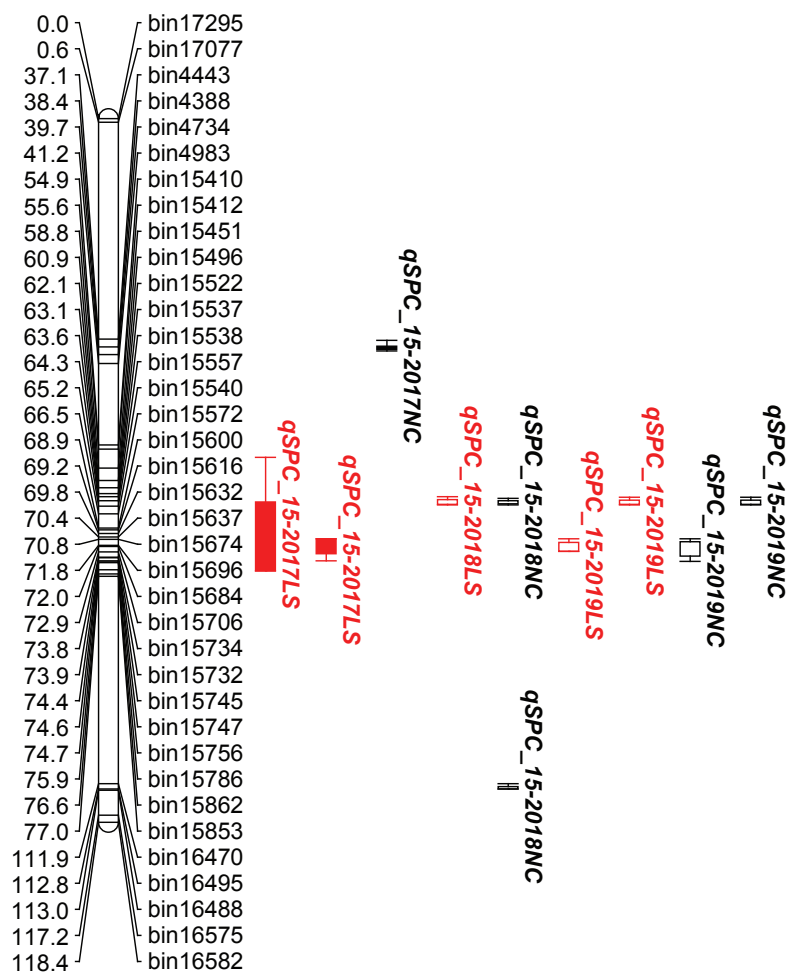

Gm16(J)

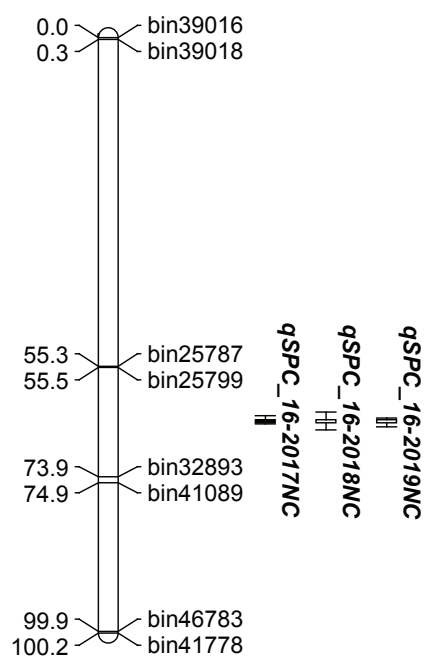

Gm20(I)

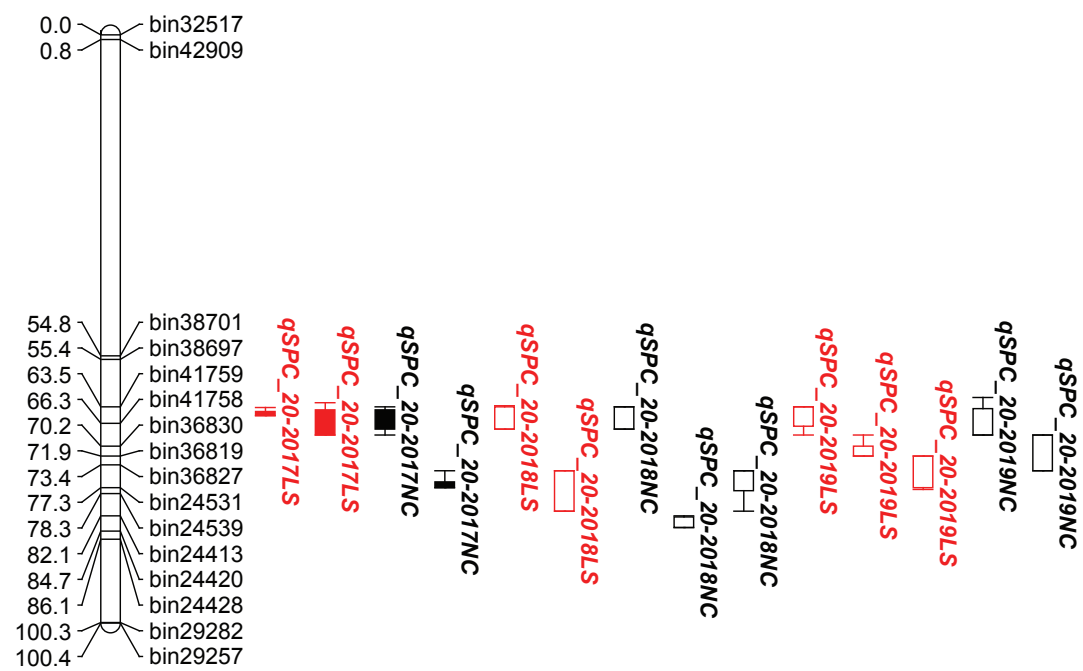

Supplement: 12870_2021_3176_MOESM4_ESM.pdf [file 12870_2021_3176_MOESM4_ESM.pdf]
