# Supplementary material for: Genetic mapping high protein content QTL from soybean ‘Nanxiadou 25’ and candidate gene analysis
Source: PubMed Central journal article supplement (PMC8377855; doi:10.1186/s12870-021-03176-2), 2021-08-20

a

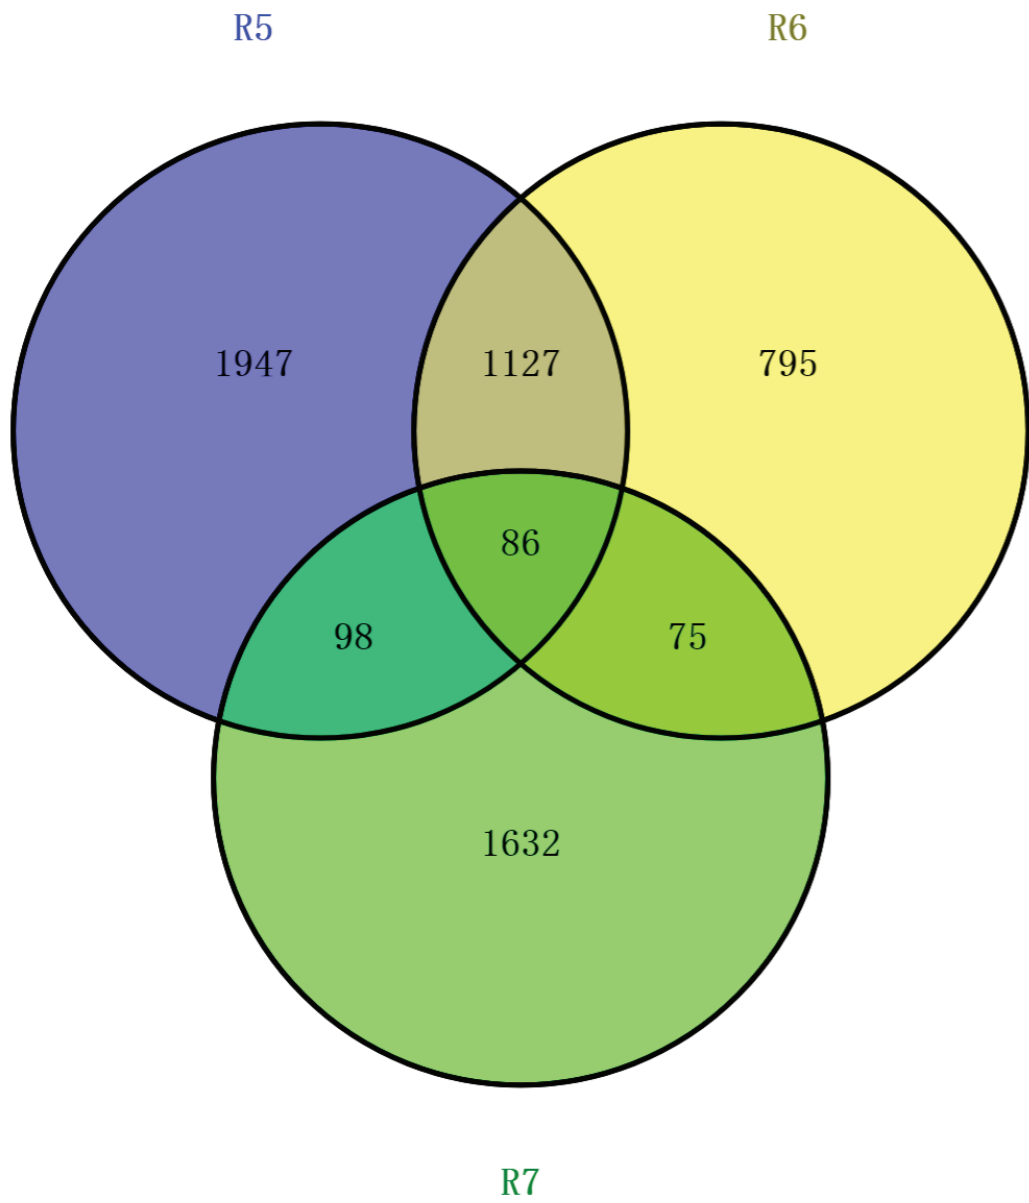

b

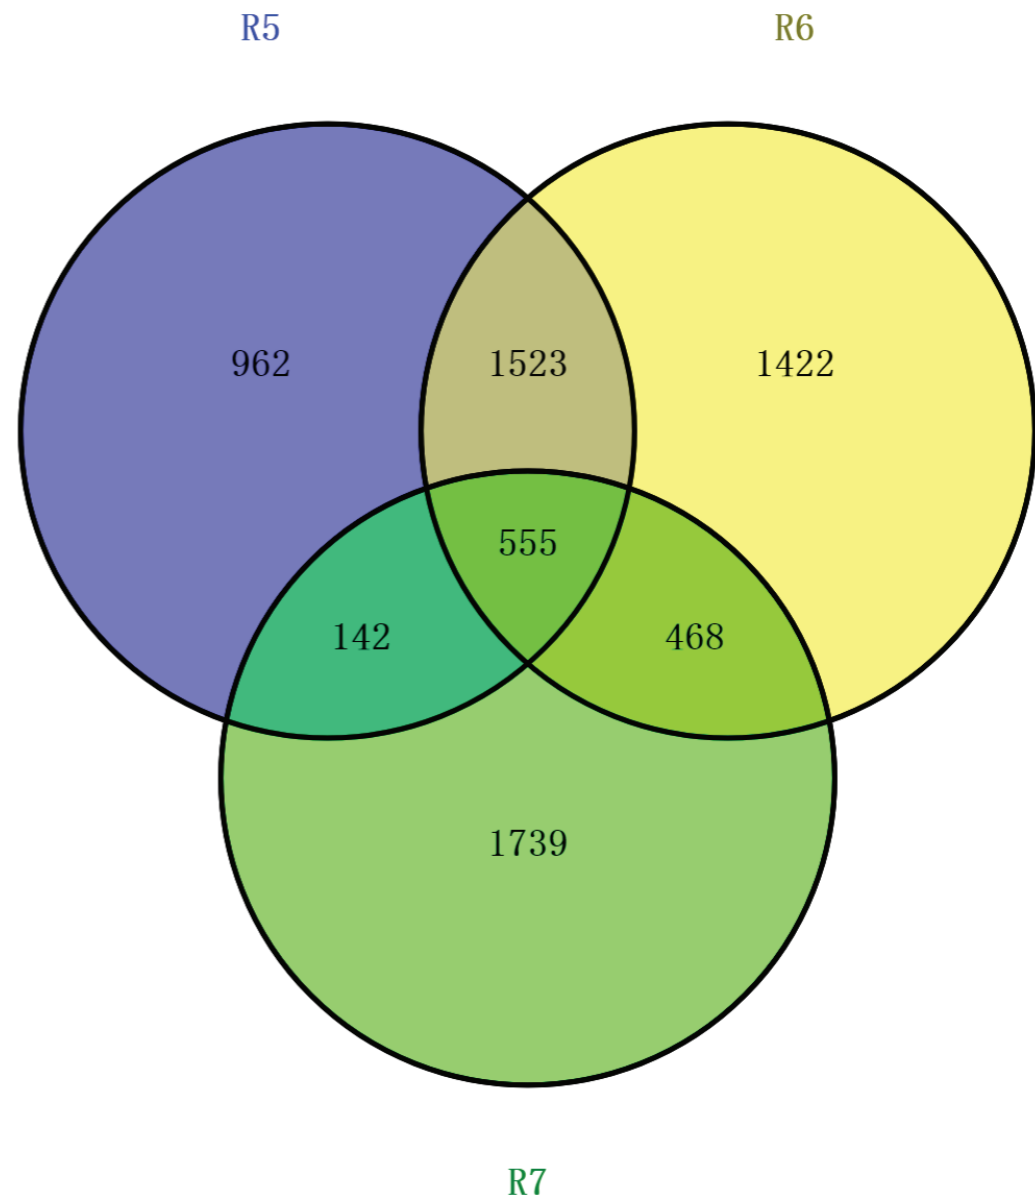

Supplement: 12870_2021_3176_MOESM6_ESM.pdf [file 12870_2021_3176_MOESM6_ESM.pdf]
