# Supplementary material for: Genetic mapping high protein content QTL from soybean ‘Nanxiadou 25’ and candidate gene analysis
Source: PubMed Central journal article supplement (PMC8377855; doi:10.1186/s12870-021-03176-2), 2021-08-20
Supplement: 12870_2021_3176_MOESM7_ESM.pdf [file 12870_2021_3176_MOESM7_ESM.pdf]

a

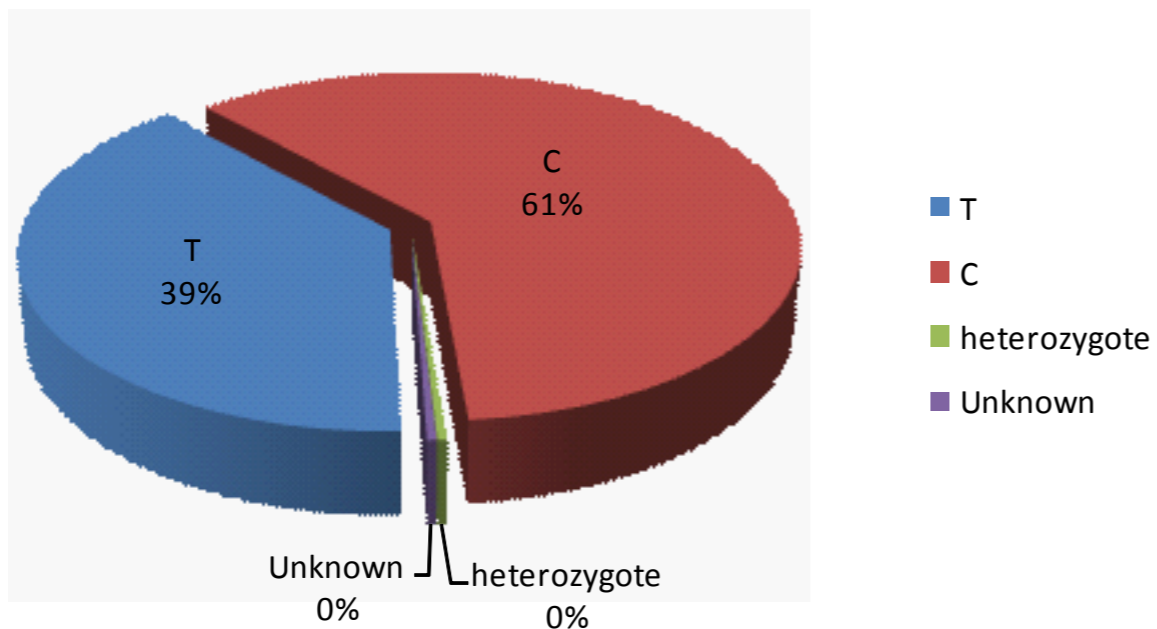

b

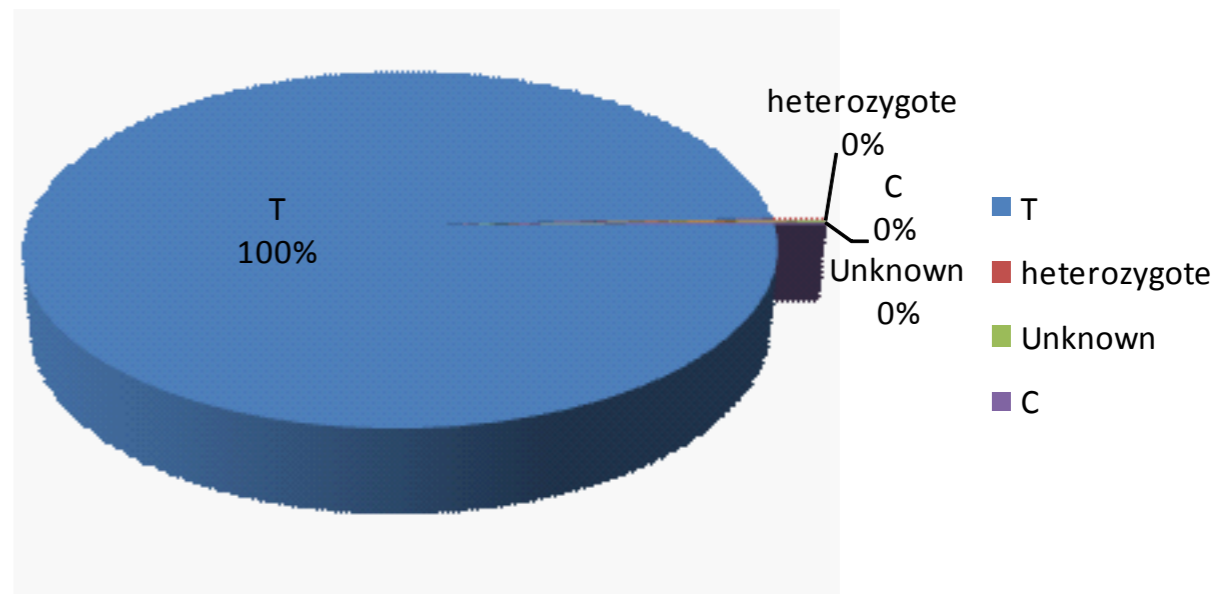

c

|                 |                                                                                                       |     |
|-----------------|-------------------------------------------------------------------------------------------------------|-----|
| Willams 82      | MKFNSRNWVTLIASVWMSFTVSVMEGVRPLPNPLIEAHGHVKHATAKRWAVLVAGSKGYDNYRHQADVCHAYQVLKKGGLKDENIIVFMYDDIANHTLNP  | 100 |
| Tongdou 11      | MKFNI RNWVTLIASVWMSFTVSVMEGVRPLPNPLIEAHGHVKHATAKRWAVLVAGSKGYDNYRHQADVCHAYQVLKKGGLKDENIIVFMYDDIANHTLNP | 100 |
| Shiyuehuang     | MKFNSRNWVTLIASVWMSFTVSVMEGVRPLPNPLIEAHGHVKHATAKRWAVLVAGSKGYDNYRHQADVCHAYQVLKKGGLKDENIIVFMYDDIANHTLNP  | 100 |
| B Kang 57       | MKFNSRNWVTLIASVWMSFTVSVMEGVRPLPNPLIEAHGHVKHATAKRWAVLVAGSKGYDNYRHQADVCHAYQVLKKGGLKDENIIVFMYDDIANHTLNP  | 100 |
| Rongxiandongdou | MKFNSRNWVTLIASVWMSFTVSVMEGVRPLPNPLIEAHGHVKHATAKRWAVLVAGSKGYDNYRHQADVCHAYQVLKKGGLKDENIIVFMYDDIANHTLNP  | 100 |
| Nanxiadou 30    | MKFNSRNWVTLIASVWMSFTVSVMEGVRPLPNPLIEAHGHVKHATAKRWAVLVAGSKGYDNYRHQADVCHAYQVLKKGGLKDENIIVFMYDDIANHTLNP  | 100 |
| Nandou 12       | MKFNSRNWVTLIASVWMSFTVSVMEGVRPLPNPLIEAHGHVKHATAKRWAVLVAGSKGYDNYRHQADVCHAYQVLKKGGLKDENIIVFMYDDIANHTLNP  | 100 |
| Nanxiadou 25    | MKFNSRNWVTLIASVWMSFTVSVMEGVRPLPNPLIEAHGHVKHATAKRWAVLVAGSKGYDNYRHQADVCHAYQVLKKGGLKDENIIVFMYDDIANHTLNP  | 100 |

|                 |                                                                                                        |     |
|-----------------|--------------------------------------------------------------------------------------------------------|-----|
| Willams 82      | RLGTVINKPNGPDVYKGVPKDYTGNAATSENFYAVISGNRSALSGSGKVVDSGPNDTIFIYYADHGATGVI GMPV GDFVMANDFVDVLK KKHAAKSYKK | 200 |
| Tongdou 11      | RLGTVINKPNGPDVYKGVPKDYTGNAATSENFYAVISGNRSALSGSGKVVDSGPNDTIFIYYADHGATGVI GMPV GDFVMANDFVDVLK KKHAAKSYKK | 200 |
| Shiyuehuang     | RLGTVINKPNGPDVYKGVPKDYTGNAATSENFYAVISGNRSALSGSGKVVDSGPNDTIFIYYADHGATGVI GMPV GDFVMANDFVDVLK KKHAAKSYKK | 200 |
| B Kang 57       | RLGTVINKPNGPDVYKGVPKDYTGNAATSENFYAVISGNRSALSGSGKVVDSGPNDTIFIYYADHGATGVI GMPV GDFVMANDFVDVLK KKHAAKSYKK | 200 |
| Rongxiandongdou | RLGTVINKPNGPDVYKGVPKDYTGNAATSENFYAVISGNRSALSGSGKVVDSGPNDTIFIYYADHGATGVI GMPV GDFVMANDFVDVLK KKHAAKSYKK | 200 |
| Nanxiadou 30    | RLGTVINKPNGPDVYKGVPKDYTGNAATSENFYAVISGNRSALSGSGKVVDSGPNDTIFIYYADHGATGVI GMPV GDFVMANDFVDVLK KKHAAKSYKK | 200 |
| Nandou 12       | RLGTVINKPNGPDVYKGVPKDYTGNAATSENFYAVISGNRSALSGSGKVVDSGPNDTIFIYYADHGATGVI GMPV GDFVMANDFVDVLK KKHAAKSYKK | 200 |
| Nanxiadou 25    | RLGTVINKPNGPDVYKGVPKDYTGNAATSENFYAVISGNRSALSGSGKVVDSGPNDTIFIYYADHGATGVI GMPV GDFVMANDFVDVLK KKHAAKSYKK | 200 |

|                 |                                                                                                     |     |
|-----------------|-----------------------------------------------------------------------------------------------------|-----|
| Willams 82      | MVIYMEACESGSMFEGILPNNIDVYATTAANTDEDSYGFYCPDLYTPPPEYTTCLGDEYSISWLESDKNDMVNETLQQQYETVRRRTLVS HINATSHV | 300 |
| Tongdou 11      | MVIYMEACESGSMFEGILPNNIDVYATTAANTDEDSYGFYCPDLYTPPPEYTTCLGDEYSISWLESDKNDMVNETLQQQYETVRRRTLVS HINATSHV | 300 |
| Shiyuehuang     | MVIYMEACESGSMFEGILPNNIDVYATTAANTDEDSYGFYCPDLYTPPPEYTTCLGDEYSISWLESDKNDMVNETLQQQYETVRRRTLVS HINATSHV | 300 |
| B Kang 57       | MVIYMEACESGSMFEGILPNNIDVYATTAANTDEDSYGFYCPDLYTPPPEYTTCLGDEYSISWLESDKNDMVNETLQQQYETVRRRTLVS HINATSHV | 300 |
| Rongxiandongdou | MVIYMEACESGSMFEGILPNNIDVYATTAANTDEDSYGFYCPDLYTPPPEYTTCLGDEYSISWLESDKNDMVNETLQQQYETVRRRTLVS HINATSHV | 300 |
| Nanxiadou 30    | MVIYMEACESGSMFEGILPNNIDVYATTAANTDEDSYGFYCPDLYTPPPEYTTCLGDEYSISWLESDKNDMVNETLQQQYETVRRRTLVS HINATSHV | 300 |
| Nandou 12       | MVIYMEACESGSMFEGILPNNIDVYATTAANTDEDSYGFYCPDLYTPPPEYTTCLGDEYSISWLESDKNDMVNETLQQQYETVRRRTLVS HINATSHV | 300 |
| Nanxiadou 25    | MVIYMEACESGSMFEGILPNNIDVYATTAANTDEDSYGFYCPDLYTPPPEYTTCLGDEYSISWLESDKNDMVNETLQQQYETVRRRTLVS HINATSHV | 300 |

|                 |                                                                                                           |     |
|-----------------|-----------------------------------------------------------------------------------------------------------|-----|
| Willams 82      | MQYGDKELNND SLAIYIGALAPSLSLNENAH SFEQSTTQTKLISQRDTRLLHLRLELQKAQDGSEK LKAQKELADEIAHRKHVDNVVHLIGDLLFGEENS   | 400 |
| Tongdou 11      | MQYGDKELNND SLAIYIGALAPSLSLNENAH SFEQSTTQTKLISQRDTRLLHLRLELQKAQDGSEK LKAQKELADEIAHRKHVDNVVHLIGDLLFGEENS   | 400 |
| Shiyuehuang     | MQYGDKELNND SLAIYIGALAPSLSLNENAH SFEQSTTQTKLISQRDTRLLHLRLELQKAQDGSEK LKAQKELADEIAHRKHVDNVVHLIGDLLFGEENS   | 400 |
| B Kang 57       | MQYGDKELNND SLAIYIGALAPSLSLNENAH SFEQSTTQTKLISQRDTRLLHLRLELQKAQDGSEK LKAQKELADEIAHRKHVDNVVHLIGDLLFGEENS   | 400 |
| Rongxiandongdou | MQYGDKELNND SLAIYIGALAPSLSLNENAH SFEQSTTQTKLISQRDTRLLHLRLELQKAQDGSEK LKAQKELADEIAHRKHVDNVVHLIGDLLFGEENS   | 400 |
| Nanxiadou 30    | MQYGDKELNND SLAIYIGALAP. . SLNENAH SFEQSTTQTKLISQRDARLLHLRLELQKAQDGSEK LKAQKELDDEIAHRKHIDNVVHLIGDLLFGEENS | 398 |
| Nandou 12       | MQYGDKELNND SLAIYIGALAP. . SLNENAH SFEQSTTQTKLISQRDARLLHLRLELQKAQDGSEK LKAQKELDDEIAHRKHIDNVVHLIGDLLFGEENS | 398 |
| Nanxiadou 25    | MQYGDKELNND SLAIYIGALAP. . SLNENAH SFEQSTTQTKLISQRDARLLHLRLELQKAQDGSEK LKAQKELDDEIAHRKHIDNVVHLIGDLLFGEENS | 398 |

|                 |                                                                           |     |
|-----------------|---------------------------------------------------------------------------|-----|
| Willams 82      | SAMMFHVRPAGKPLVDDWDCFKTLVKTYESQCGTLSSYGRKYTRAFANMCNAGIYEEQLKTTTSQACPQKNHA | 473 |
| Tongdou 11      | SAMMFHVRPAGKPLVDDWDCFKTLVKTYESQCGTLSSYGRKYTRAFANMCNAGIYEEQLKTTTSQACPQKNHA | 473 |
| Shiyuehuang     | SAMMFHVRPAGKPLVDDWDCFKTLVKTYESQCGTLSSYGRKYTRAFANMCNAGIYEEQLKTTTSQACPQKNHA | 473 |
| B Kang 57       | SAMMFHVRPAGKPLVDDWDCFKTLVKTYESQCGTLSSYGRKYTRAFANMCNAGIYEEQLKTTTSQACPQKNHA | 473 |
| Rongxiandongdou | SAMMFHVRPAGKPLVDDWDCFKTLVKTYESQCGTLSSYGRKYTRAFANMCNAGIYEEQLKTTTSQACPQKNHA | 473 |
| Nanxiadou 30    | SAMMFHVRPAGKPLVDDWDCFKTLVKTYESQCGTLSSYGRKYTRAFANMCNAGIYEEQLKTTTSQACPQKNHA | 471 |
| Nandou 12       | SAMMFHVRPAGKPLVDDWDCFKTLVKTYESQCGTLSSYGRKYTRAFANMCNAGIYEEQLKTTTSQACPQKNHA | 471 |
| Nanxiadou 25    | SAMMFHVRPAGKPLVDDWDCFKTLVKTYESQCGTLSSYGRKYTRAFANMCNAGIYEEQLKTTTSQACPQKNHA | 471 |
